# Supplementary material for: Clinical Features, Survival and Prognostic Factors of Glycogen-Rich Clear Cell Carcinoma (GRCC) of the Breast in the U.S. Population
Source: PubMed Central journal article supplement (PMC6406344; doi:10.3390/jcm8020246), 2019-02-14
Supplement: jcm-08-00246-s001.pdf [file jcm-08-00246-s001.pdf]

**Supplemental Table S1.** Demographical and clinical characteristics of glycogen-rich (GR) subgroup.

|                                          |                                     | GR    |        | Non-GRCC  |       | p-Value          |
|------------------------------------------|-------------------------------------|-------|--------|-----------|-------|------------------|
|                                          |                                     | Count | %      | Count     | %     |                  |
| Age                                      | 0–60 years                          | 22    | 48.9%  | 592,600   | 47.3% | 0.84             |
|                                          | >60 years                           | 23    | 51.1%  | 659,094   | 52.7% |                  |
| Sex                                      | Female                              | 45    | 100.0% | 1,242,754 | 99.3% | 0.57             |
|                                          | Male                                | 0     | 0.0%   | 8,940     | 0.7%  |                  |
| Race                                     | American Indian/ Alaska Native      | 0     | 0.0%   | 6,100     | 0.5%  | 0.91             |
|                                          | Asian or Pacific Islander           | 2     | 4.4%   | 85,417    | 6.8%  |                  |
|                                          | Black                               | 5     | 11.1%  | 123,092   | 9.8%  |                  |
|                                          | Unknown                             | 0     | 0.0%   | 5,968     | 0.5%  |                  |
|                                          | White                               | 38    | 84.4%  | 1,031,117 | 82.4% |                  |
| Grade                                    | Well differentiated; Grade I        | 3     | 6.7%   | 216,527   | 17.3% | <b>0.04</b>      |
|                                          | Moderately differentiated; Grade II | 13    | 28.9%  | 446,867   | 35.7% |                  |
|                                          | Poorly differentiated; Grade III    | 22*   | 48.9%  | 365,945   | 29.2% |                  |
|                                          | Anaplastic; Grade IV                | 1     | 2.2%   | 16,941    | 1.4%  |                  |
|                                          | Unknown                             | 6     | 13.3%  | 205,414   | 16.4% |                  |
| ER Status <sup>a</sup>                   | Negative                            | 16*   | 36.4%  | 203,215   | 17.9% | <b>0.02</b>      |
|                                          | Positive                            | 24    | 54.5%  | 807,683*  | 71.1% |                  |
|                                          | Borderline                          | 0     | 0.0%   | 2,837     | 0.2%  |                  |
|                                          | Unknown                             | 4     | 9.1%   | 121,615   | 10.7% |                  |
| PR Status <sup>a</sup>                   | Negative                            | 23*   | 52.3%  | 311,034   | 27.4% | <b>.003</b>      |
|                                          | Positive                            | 17    | 38.6%  | 683,633*  | 60.2% |                  |
|                                          | Borderline                          | 0     | 0.0%   | 5,794     | 0.5%  |                  |
| HER2 Status <sup>c</sup>                 | Unknown                             | 4     | 9.1%   | 134,889   | 11.9% | 0.75             |
|                                          | Negative                            | 12    | 85.7%  | 291,251   | 78.5% |                  |
|                                          | Positive                            | 1     | 7.1%   | 52,022    | 14.0% |                  |
|                                          | Borderline                          | 0     | 0.0%   | 8,250     | 2.2%  |                  |
| IHC based intrinsic Subtype <sup>e</sup> | Unknown                             | 1     | 7.1%   | 19,360    | 5.2%  | <b>0.002</b>     |
|                                          | HER2-/HR+                           | 6     | 42.9%  | 251,952*  | 67.9% |                  |
|                                          | HER2+/HR-                           | 1     | 7.1%   | 15,597    | 4.2%  |                  |
|                                          | HER2+/HR+                           | 0     | 0.0%   | 36,270    | 9.8%  |                  |
|                                          | Triple Negative                     | 6*    | 42.9%  | 38,757    | 10.4% |                  |
| AJCC 6th Stage                           | Unknown                             | 1     | 7.1%   | 28,307    | 7.6%  | 0.06             |
|                                          | I                                   | 14    | 31.1%  | 525,692   | 42.0% |                  |
|                                          | II                                  | 21*   | 46.7%  | 365,574   | 29.2% |                  |
|                                          | III                                 | 5     | 11.1%  | 139,308   | 11.1% |                  |
|                                          | IV                                  | 3     | 6.7%   | 54,278    | 4.3%  |                  |
| T                                        | Unknown                             | 2     | 4.4%   | 166,842   | 13.3% | <b>0.02</b>      |
|                                          | T0                                  | 0     | 0.0%   | 1,110     | 0.1%  |                  |
|                                          | T1                                  | 17    | 37.8%  | 647,886   | 51.8% |                  |
|                                          | T2                                  | 21*   | 46.7%  | 295,234   | 23.6% |                  |
|                                          | T3                                  | 0     | 0.0%   | 49,240    | 3.9%  |                  |
|                                          | T4                                  | 2     | 4.4%   | 33,932    | 2.7%  |                  |
|                                          | Tis                                 | 0     | 0.0%   | 1,791     | 0.1%  |                  |
| N                                        | Unknown                             | 5     | 11.1%  | 222,501   | 17.8% | 0.31             |
|                                          | N0                                  | 26    | 57.8%  | 718,263   | 57.4% |                  |
|                                          | N1                                  | 12    | 26.7%  | 234,469   | 18.7% |                  |
|                                          | N2                                  | 3     | 6.7%   | 68,569    | 5.5%  |                  |
|                                          | N3                                  | 2     | 4.4%   | 48,866    | 3.9%  |                  |
| M                                        | Unknown                             | 2     | 4.4%   | 181,527   | 14.5% | 0.43             |
|                                          | M0                                  | 40    | 88.9%  | 1,083,274 | 86.5% |                  |
|                                          | M1                                  | 3     | 6.7%   | 54,278    | 4.3%  |                  |
| Bone Metastasis <sup>c</sup>             | Unknown                             | 2     | 4.4%   | 114,142   | 9.1%  | 0.69             |
|                                          | No Metastasis                       | 14    | 100.0% | 351,808   | 94.9% |                  |
|                                          | Metastasis                          | 0     | 0.0%   | 13,265    | 3.6%  |                  |
| Brain Metastasis <sup>c</sup>            | Unknown                             | 0     | 0.0%   | 5,810     | 1.6%  | <b>&lt;0.001</b> |
|                                          | No Metastasis                       | 13    | 92.9%  | 363,226   | 97.9% |                  |
|                                          | Metastasis                          | 1*    | 7.1%   | 1,501     | 0.4%  |                  |

|                                |                             |    |       |         |       |      |
|--------------------------------|-----------------------------|----|-------|---------|-------|------|
|                                | Unknown                     | 0  | 0.0%  | 6,156   | 1.7%  |      |
| Liver Metastasis <sup>c</sup>  | No Metastasis               | 13 | 92.9% | 359,808 | 97.0% | 0.16 |
|                                | Metastasis                  | 1  | 7.1%  | 5,079   | 1.4%  |      |
|                                | Unknown                     | 0  | 0.0%  | 5,996   | 1.6%  |      |
|                                |                             |    |       |         |       |      |
| Lung Metastasis <sup>c</sup>   | No Metastasis               | 13 | 92.9% | 358,528 | 96.7% | 0.25 |
|                                | Metastasis                  | 1  | 7.1%  | 6,198   | 1.7%  |      |
|                                | Unknown                     | 0  | 0.0%  | 6,157   | 1.7%  |      |
|                                |                             |    |       |         |       |      |
| Surgery <sup>b</sup>           | No Surgery                  | 1  | 2.4%  | 70,378  | 7.3%  | 0.42 |
|                                | Surgery                     | 40 | 97.6% | 889,333 | 92.0% |      |
|                                | Unknown                     | 0  | 0.0%  | 6,824   | 0.7%  |      |
|                                |                             |    |       |         |       |      |
| Extent of Surgery <sup>b</sup> | No Surgery                  | 1  | 2.4%  | 75,884  | 7.9%  | 0.55 |
|                                | Sub-Mastectomy <sup>#</sup> | 21 | 51.2% | 485,659 | 50.2% |      |
|                                | Mastectomy                  | 19 | 46.3% | 401,409 | 41.5% |      |
|                                | Surgery, Unknown            | 0  | 0.0%  | 1,358   | 0.1%  |      |
|                                | Unknown                     | 0  | 0.0%  | 2,225   | 0.2%  |      |
| Radiation <sup>b</sup>         | No Radiation                | 20 | 48.8% | 426,240 | 44.1% | 0.75 |
|                                | Radiation                   | 19 | 46.3% | 513,484 | 53.1% |      |
|                                | Unknown                     | 2  | 4.9%  | 26,811  | 2.8%  |      |
|                                |                             |    |       |         |       |      |

Bolded are statistically significant p-values when comparing between clear cell/glycogen-rich to other carcinomas of the breast. \* Statistically significant differences between column proportions. # Defined as any surgery less aggressive than total mastectomy. <sup>a,b,c</sup> Variable available for cases diagnosed after 1990, 1998 and 2010 respectively. GRCC—glycogen-rich clear cell; ER—estrogen receptor; PR—progesterone receptor; IHC—immunohistochemistry; HER2—human epidermal growth factor receptor 2; HER2+—human epidermal growth factor receptor 2 positive; HER2—human epidermal growth factor receptor 2 negative; HR+—hormone receptor positive; HR—hormone receptor negative; AJCC—American Joint Committee on Cancer; T, N, M refers to tumor size, nodal status, and metastasis classifications of malignant tumor staging system, respectively.

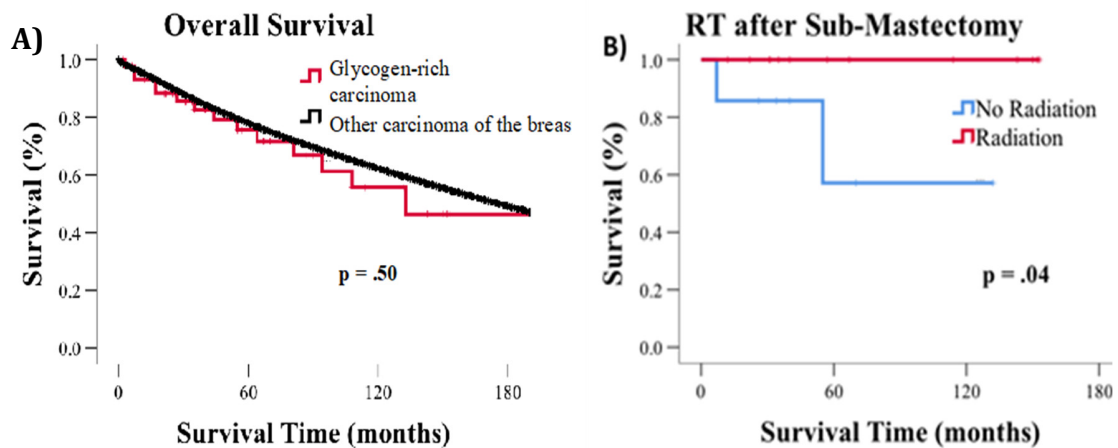

**Supplemental Figure S1.** Kaplan-Meier survival curves for (A) overall survival and (B) with or without radiation therapy (RT) after sub-mastectomy in the glycogen rich (GR) subgroup.

Supplemental Table S2. Survival duration in the glycogen rich (GR) subgroup.

|                    |                                     | Months | 95% CI |       | p-Value     |
|--------------------|-------------------------------------|--------|--------|-------|-------------|
|                    |                                     |        | Lower  | Upper |             |
| All GR cases       |                                     | 127.5  | -      | -     | NA          |
| Age                | 60 years and under                  | 133    | 96.6   | 219.4 | 0.20        |
|                    | > 60 year                           | 73     | 18.6   | 127.4 |             |
| Sex                | Female                              | 133    | -      | -     | NA          |
|                    | Male                                | NA     | NA     | NA    |             |
| Race               | Asian or Pacific Islander           | 64     | -      | -     | 1.0         |
|                    | Black                               | 133    | -      | -     |             |
|                    | White                               | -      | -      | -     |             |
| Grade              | Well to Moderately Differentiated   | 162    | 105.1  | 218.9 | 0.19        |
|                    | Poorly Differentiated to Anaplastic | 111    | -      | -     |             |
| ER Status          | Negative                            | -      | -      | -     | 0.96        |
|                    | Positive                            | -      | -      | -     |             |
| PR Status          | Negative                            | -      | -      | -     | 0.54        |
|                    | Positive                            | -      | -      | -     |             |
| AJCC Stage         | I-II                                | -      | -      | -     | 0.12        |
|                    | III-IV                              | 94     | -      | -     |             |
| T                  | T1-2                                | -      | -      | -     | 0.06        |
|                    | T3-4                                | 27     | -      | -     |             |
| N                  | No nodal involvement (N0)           | -      | -      | -     | <b>0.02</b> |
|                    | Nodal Involvement (N1-3)            | 81     | 17.2   | 144.7 |             |
| M                  | M0                                  | -      | -      | -     | 0.28        |
|                    | M1                                  | -      | -      | -     |             |
| Surgery            | No Surgery                          | 7      | -      | -     | 0.06        |
|                    | Surgery                             | 133    | -      | -     |             |
| Surgical Procedure | No Surgery                          | 7      | -      | -     | 0.08        |
|                    | Sub-Mastectomy <sup>#</sup>         | 94     | 65.2   | 122.8 |             |
|                    | Mastectomy                          | 133    | -      | -     |             |
| Radiation          | No Radiation                        | 81     | 27.3   | 134.7 | 0.10        |
|                    | Radiation                           | -      | -      | -     |             |

HER2 Status was only available for cases diagnosed after 2010 and was therefore excluded from the analysis. Bolded are statistically significant p-values. "-" Median survival time was not reached or could not be calculated. <sup>#</sup> Defined as any surgery less aggressive than total mastectomy. CI—confidence interval; ER—estrogen receptor; PR—progesterone receptor; AJCC—American Joint Committee on Cancer; NA—not applicable; T, N, M refers to tumor size, nodal status and metastasis classifications of malignant tumor staging system, respectively.

Supplemental Table S3. Demographical and clinical characteristics of clear cell (CC) subgroup.

|       |                                     | CC    |       | Non-GRCC  |       | p-Value          |
|-------|-------------------------------------|-------|-------|-----------|-------|------------------|
|       |                                     | Count | %     | Count     | %     |                  |
| Age   | 0-60 years                          | 56    | 50.9% | 592,544   | 47.3% | 0.45             |
|       | >60 years                           | 54    | 49.1% | 659,040   | 52.7% |                  |
| Sex   | Female                              | 107   | 97.3% | 1242647*  | 99.3% | <b>0.012</b>     |
|       | Male                                | 3*    | 2.7%  | 8,937     | 0.7%  |                  |
| Race  | American Indian/ Alaska Native      | 1     | 0.9%  | 6,099     | 0.5%  | 0.77             |
|       | Asian or Pacific Islander           | 10    | 9.1%  | 85,407    | 6.8%  |                  |
|       | Black                               | 11    | 10.0% | 123,081   | 9.8%  |                  |
|       | Unknown                             | 1     | 0.9%  | 5,967     | 0.5%  |                  |
|       | White                               | 87    | 79.1% | 1,031,030 | 82.4% |                  |
| Grade | Well differentiated; Grade I        | 2     | 1.8%  | 216,525   | 17.3% | <b>&lt;0.001</b> |
|       | Moderately differentiated; Grade II | 40*   | 36.4% | 446,827   | 35.7% |                  |
|       | Poorly differentiated; Grade III    | 42*   | 38.2% | 365,903   | 29.2% |                  |
|       | Anaplastic; Grade IV                | 4     | 3.6%  | 16,937    | 1.4%  |                  |

|                                           |                             |     |       |           |       |        |
|-------------------------------------------|-----------------------------|-----|-------|-----------|-------|--------|
|                                           | Unknown                     | 22  | 20.0% | 205,392   | 16.4% |        |
| ER Status <sup>a</sup>                    | Negative                    | 42* | 42.0% | 203,173   | 17.9% | <0.001 |
|                                           | Positive                    | 43  | 43.0% | 807640*   | 71.1% |        |
|                                           | Borderline                  | 0   | 0.0%  | 2,837     | 0.2%  |        |
|                                           | Unknown                     | 15  | 15.0% | 121,600   | 10.7% |        |
| PR Status <sup>a</sup>                    | Negative                    | 61* | 61.0% | 310,973   | 27.4% | <0.001 |
|                                           | Positive                    | 23  | 23.0% | 683610*   | 60.2% |        |
|                                           | Borderline                  | 0   | 0.0%  | 5,794     | 0.5%  |        |
|                                           | Unknown                     | 16  | 16.0% | 134,873   | 11.9% |        |
| HER2 Status <sup>c</sup>                  | Negative                    | 13  | 86.7% | 291,238   | 78.5% | 0.78   |
|                                           | Positive                    | 1   | 6.7%  | 52,021    | 14.0% |        |
|                                           | Borderline                  | 0   | 0.0%  | 8,250     | 2.2%  |        |
|                                           | Unknown                     | 1   | 6.7%  | 19,359    | 5.2%  |        |
| IHC based intrinsic Subtypes <sup>c</sup> | HER2-/HR+                   | 6   | 40.0% | 251946*   | 67.9% | <0.001 |
|                                           | HER2+/HR-                   | 0   | 0.0%  | 15,597    | 4.2%  |        |
|                                           | HER2+/HR+                   | 1   | 6.7%  | 36,269    | 9.8%  |        |
|                                           | Triple Negative             | 7*  | 46.7% | 38,750    | 10.4% |        |
|                                           | Unknown                     | 1   | 6.7%  | 28,306    | 7.6%  |        |
| AJCC 6th Stage                            | I                           | 40  | 36.4% | 525,652   | 42.0% | 0.33   |
|                                           | II                          | 38  | 34.5% | 365,536   | 29.2% |        |
|                                           | III                         | 12  | 10.9% | 139,296   | 11.1% |        |
|                                           | IV                          | 8   | 7.3%  | 54,270    | 4.3%  |        |
|                                           | Unknown                     | 12  | 10.9% | 166,830   | 13.3% |        |
| T                                         | T0                          | 0   | 0.0%  | 1,110     | 0.1%  | 0.16   |
|                                           | T1                          | 46  | 41.8% | 647840*   | 51.8% |        |
|                                           | T2                          | 36* | 32.7% | 295,198   | 23.6% |        |
|                                           | T3                          | 7   | 6.4%  | 49,233    | 3.9%  |        |
|                                           | T4                          | 1   | 0.9%  | 33,931    | 2.7%  |        |
|                                           | Tis                         | 0   | 0.0%  | 1,791     | 0.1%  |        |
|                                           | Unknown                     | 20  | 18.2% | 222,481   | 17.8% |        |
| N                                         | N0                          | 65  | 59.1% | 718,198   | 57.4% | 0.99   |
|                                           | N1                          | 20  | 18.2% | 234,449   | 18.7% |        |
|                                           | N2                          | 6   | 5.5%  | 68,563    | 5.5%  |        |
|                                           | N3                          | 4   | 3.6%  | 48,862    | 3.9%  |        |
|                                           | Unknown                     | 15  | 13.6% | 181,512   | 14.5% |        |
| M                                         | M0                          | 92  | 83.6% | 1,083,182 | 86.5% | 0.32   |
|                                           | M1                          | 8   | 7.3%  | 54,270    | 4.3%  |        |
|                                           | Unknown                     | 10  | 9.1%  | 114,132   | 9.1%  |        |
| Bone Metastasis <sup>c</sup>              | No Metastasis               | 13  | 86.7% | 351,795   | 94.9% | 0.22   |
|                                           | Metastasis                  | 1   | 6.7%  | 13,264    | 3.6%  |        |
|                                           | Unknown                     | 1   | 6.7%  | 5,809     | 1.6%  |        |
| Brain Metastasis <sup>c</sup>             | No Metastasis               | 14  | 93.3% | 363,212   | 97.9% | 0.31   |
|                                           | Metastasis                  | 0   | 0.0%  | 1,501     | 0.4%  |        |
|                                           | Unknown                     | 1   | 6.7%  | 6,155     | 1.7%  |        |
| Liver Metastasis <sup>c</sup>             | No Metastasis               | 14  | 93.3% | 359,794   | 97.0% | 0.27   |
|                                           | Metastasis                  | 0   | 0.0%  | 5,079     | 1.4%  |        |
|                                           | Unknown                     | 1   | 6.7%  | 5,995     | 1.6%  |        |
| Lung Metastasis <sup>c</sup>              | No Metastasis               | 14  | 93.3% | 358,514   | 96.7% | 0.28   |
|                                           | Metastasis                  | 0   | 0.0%  | 6,198     | 1.7%  |        |
|                                           | Unknown                     | 1   | 6.7%  | 6,156     | 1.7%  |        |
| Surgery <sup>b</sup>                      | No Surgery                  | 6   | 7.0%  | 70,372    | 7.3%  | 0.20   |
|                                           | Surgery                     | 78  | 90.7% | 889,255   | 92.0% |        |
|                                           | Unknown                     | 2   | 2.3%  | 6,822     | 0.7%  |        |
| Extent of Surgery <sup>b</sup>            | No Surgery                  | 7   | 8.1%  | 75,877    | 7.9%  | 0.25   |
|                                           | Sub-Mastectomy <sup>#</sup> | 49  | 57.0% | 485,610   | 50.2% |        |
|                                           | Mastectomy                  | 29  | 33.7% | 401,380   | 41.5% |        |
|                                           | Surgery, Unknown            | 0   | 0.0%  | 1,358     | 0.1%  |        |
|                                           | Unknown                     | 1   | 1.2%  | 2,224     | 0.2%  |        |
| Radiation <sup>b</sup>                    | No Radiation                | 44  | 51.2% | 426,196   | 44.1% | 0.35   |

|           |    |       |         |       |
|-----------|----|-------|---------|-------|
| Radiation | 39 | 45.3% | 513,445 | 53.1% |
| Unknown   | 3  | 3.5%  | 26,808  | 2.8%  |

Bolded are statistically significant *p*-values when comparing clear cell carcinoma to other carcinomas of the breast. \* Statistically significant differences between column proportions. # Defined as any surgery less aggressive than total mastectomy. <sup>a,b,c</sup> Variable available for cases diagnosed after 1990, 1998 and 2010 respectively. GRCC—glycogen-rich clear cell; ER—estrogen receptor; PR—progesterone receptor; IHC—immunohistochemistry; HER2—human epidermal growth factor receptor 2; HER2+—human epidermal growth factor receptor 2 positive; HER2—human epidermal growth factor receptor 2 negative; HR+—hormone receptor positive; HR—hormone receptor negative; AJCC—American Joint Committee on Cancer; T, N, M refers to tumor size, nodal status and metastasis classifications of malignant tumor staging system, respectively.

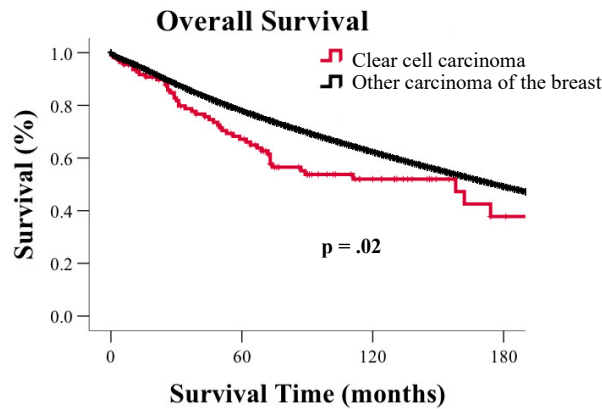

Supplemental Figure S2. Kaplan-Meier survival curves for clear cell (CC) subgroup.

Supplemental Table S4. Survival duration in the clear cell (CC) subgroup.

|            |                                     | Months | 95% CI |       | <i>p</i> -Value  |
|------------|-------------------------------------|--------|--------|-------|------------------|
|            |                                     |        | Lower  | Upper |                  |
| All Cases  |                                     | 158    | 80.6   | 235.4 | NA               |
| Age        | 60 years and under                  | 73     | 63.6   | 82.4  | <b>0.006</b>     |
|            | >60 year                            | 158    | 80.6   | 235.4 |                  |
| Sex        | Female                              | 158    | 80.9   | 235.1 | 0.62             |
|            | Male                                | 73     | 18.6   | 127.4 |                  |
| Race       | American Indian/Alaska Native       | 27     | -      | -     | 0.17             |
|            | Asian or Pacific Islander           | -      | -      | -     |                  |
|            | Black                               | -      | -      | -     |                  |
|            | White                               | 111    | 27.7   | 194.3 |                  |
| Grade      | Well to Moderately Differentiated   | 162    | 69.2   | 254.8 | 0.16             |
|            | Poorly Differentiated to Anaplastic | 111    | -      | -     |                  |
| ER Status  | Negative                            | 158    | 73.7   | 242.3 | 0.82             |
|            | Positive                            | 174    | 49.5   | 298.5 |                  |
| PR Status  | Negative                            | 158    | 18.5   | 297.5 | 0.22             |
|            | Positive                            | -      | -      | -     |                  |
| AJCC Stage | I-II                                | 174    | 150.2  | 197.8 | <b>&lt;0.001</b> |
|            | III-IV                              | 37     | 11.0   | 63.0  |                  |
| T          | T1-2                                | 162    | 139.9  | 184.1 | <b>0.04</b>      |
|            | T3-4                                | 27     | 21.9   | 32.1  |                  |
| N          | No nodal involvement (N0)           | 174    | 150.0  | 198.0 | <b>0.02</b>      |
|            | Nodal Involvement (N1-3)            | 69     | -      | -     |                  |
| M          | M0                                  | 162    | 78.7   | 245.3 | <b>&lt;0.001</b> |
|            | M1                                  | 30     | 0.0    | 80.1  |                  |
| Surgery    | No Surgery                          | 25     | 0.0    | 59.0  | <b>&lt;0.001</b> |

|                   |                |     |      |       |             |
|-------------------|----------------|-----|------|-------|-------------|
|                   | Surgery        | 162 | 97.3 | 226.7 |             |
| Extent of Surgery | No Surgery     | 25  | -    | -     |             |
|                   | Sub-Mastectomy | 174 | 54.5 | 293.5 | <b>0.05</b> |
|                   | Mastectomy     | -   | -    | -     |             |
| Radiation         | No Radiation   | 73  | 2.8  | 143.2 |             |
|                   | Radiation      | 162 | -    | -     | <b>0.05</b> |

HER2 Status was only available for cases diagnosed after 2010 and was therefore excluded from the analysis. Bolded are statistically significant p-values. “-” Median survival time was not reached or could not be calculated. # Defined as any surgery less aggressive than total mastectomy. CI—confidence interval; ER—estrogen receptor; PR—progesterone receptor; AJCC—American Joint Committee on Cancer; NA—not applicable; T, N, M refers to tumor size, nodal status and metastasis classifications of malignant tumor staging system, respectively.

**Supplemental Table S5.** Multivariable analysis of overall survival for clear cell (CC) carcinomas.

| Variable            | Reference    | p-Value          | HR   | 95% CI |       |
|---------------------|--------------|------------------|------|--------|-------|
|                     |              |                  |      | Lower  | Upper |
| Age                 |              | <b>&lt;0.001</b> | 1.05 | 1.02   | 1.07  |
| AJCC Stage (III IV) | I-II         | <b>&lt;0.001</b> | 5.47 | 2.23   | 13.41 |
| Surgery             | No Surgery   | 0.58             | 0.67 | 0.16   | 2.78  |
| Radiation           | No Radiation | 0.11             | 0.55 | 0.27   | 1.14  |

Bolded are statistically significant p-values. CI—confidence interval; HR—hazards ratio; AJCC—American Joint Committee on Cancer.

**Supplemental Table S6.** Comparison of demographical and clinical characteristics between glycogen-rich (GR) and clear cell (CC) carcinomas.

|                                           |                                     | GR    |        | CC    |       | p-Value |
|-------------------------------------------|-------------------------------------|-------|--------|-------|-------|---------|
|                                           |                                     | Count | %      | Count | %     |         |
| Age                                       | 0–60 years                          | 22    | 48.9%  | 56    | 50.9% | 0.82    |
|                                           | >60 years                           | 23    | 51.1%  | 54    | 49.1% |         |
| Sex                                       | Female                              | 45    | 100.0% | 107   | 97.3% | 0.26    |
|                                           | Male                                | 0     | 0.0%   | 3     | 2.7%  |         |
| Race                                      | American Indian/ Alaska Native      | 0     | 0.0%   | 1     | 0.9%  | 0.76    |
|                                           | Asian or Pacific Islander           | 2     | 4.4%   | 10    | 9.1%  |         |
|                                           | Black                               | 5     | 11.1%  | 11    | 10.0% |         |
|                                           | Unknown                             | 0     | 0.0%   | 1     | 0.9%  |         |
|                                           | White                               | 38    | 84.4%  | 87    | 79.1% |         |
| Grade                                     | Well differentiated; Grade I        | 3     | 6.7%   | 2     | 1.8%  | 0.32    |
|                                           | Moderately differentiated; Grade II | 13    | 28.9%  | 40    | 36.4% |         |
|                                           | Poorly differentiated; Grade III    | 22    | 48.9%  | 42    | 38.2% |         |
|                                           | Anaplastic; Grade IV                | 1     | 2.2%   | 4     | 3.6%  |         |
|                                           | Unknown                             | 6     | 13.3%  | 22    | 20.0% |         |
| ER Status <sup>a</sup>                    | Negative                            | 16    | 36.4%  | 42    | 42.0% | 0.38    |
|                                           | Positive                            | 24    | 54.5%  | 43    | 43.0% |         |
|                                           | Borderline                          | 0     | 0.0%   | 0     | 0.0%  |         |
|                                           | Unknown                             | 4     | 9.1%   | 15    | 15.0% |         |
| PR Status <sup>a</sup>                    | Negative                            | 23    | 52.3%  | 61    | 61.0% | 0.13    |
|                                           | Positive                            | 17    | 38.6%  | 23    | 23.0% |         |
|                                           | Borderline                          | 0     | 0.0%   | 0     | 0.0%  |         |
|                                           | Unknown                             | 4     | 9.1%   | 16    | 16.0% |         |
| HER2 Status <sup>c</sup>                  | Negative                            | 12    | 85.7%  | 13    | 86.7% | 0.99    |
|                                           | Positive                            | 1     | 7.1%   | 1     | 6.7%  |         |
|                                           | Borderline                          | 0     | 0.0%   | 0     | 0.0%  |         |
|                                           | Unknown                             | 1     | 7.1%   | 1     | 6.7%  |         |
| IHC based intrinsic Subtypes <sup>c</sup> | HER2-/HR+                           | 6     | 42.9%  | 6     | 40.0% | 0.73    |
|                                           | HER2+/HR-                           | 1     | 7.1%   | 0     | 0.0%  |         |
|                                           | HER2+/HR+                           | 0     | 0.0%   | 1     | 6.7%  |         |

|                                |                             |    |        |    |       |      |
|--------------------------------|-----------------------------|----|--------|----|-------|------|
|                                | Triple Negative             | 6  | 42.9%  | 7  | 46.7% |      |
|                                | Unknown                     | 1  | 7.1%   | 1  | 6.7%  |      |
| AJCC 6th Stage                 | I                           | 14 | 31.1%  | 40 | 36.4% | 0.56 |
|                                | II                          | 21 | 46.7%  | 38 | 34.5% |      |
|                                | III                         | 5  | 11.1%  | 12 | 10.9% |      |
|                                | IV                          | 3  | 6.7%   | 8  | 7.3%  |      |
|                                | Unknown                     | 2  | 4.4%   | 12 | 10.9% |      |
| T                              | T0                          | 0  | 0.0%   | 0  | 0.0%  | 0.10 |
|                                | T1                          | 17 | 37.8%  | 46 | 41.8% |      |
|                                | T2                          | 21 | 46.7%  | 36 | 32.7% |      |
|                                | T3                          | 0  | 0.0%   | 7  | 6.4%  |      |
|                                | T4                          | 2  | 4.4%   | 1  | 0.9%  |      |
|                                | Tis                         | 0  | 0.0%   | 0  | 0.0%  |      |
| N                              | Unknown                     | 5  | 11.1%  | 20 | 18.2% | 0.45 |
|                                | N0                          | 26 | 57.8%  | 65 | 59.1% |      |
|                                | N1                          | 12 | 26.7%  | 20 | 18.2% |      |
|                                | N2                          | 3  | 6.7%   | 6  | 5.5%  |      |
|                                | N3                          | 2  | 4.4%   | 4  | 3.6%  |      |
| M                              | Unknown                     | 2  | 4.4%   | 15 | 13.6% | 0.60 |
|                                | M0                          | 40 | 88.9%  | 92 | 83.6% |      |
|                                | M1                          | 3  | 6.7%   | 8  | 7.3%  |      |
| Bone Metastasis <sup>c</sup>   | Unknown                     | 2  | 4.4%   | 10 | 9.1%  | 0.37 |
|                                | No Metastasis               | 14 | 100.0% | 13 | 86.7% |      |
|                                | Metastasis                  | 0  | 0.0%   | 1  | 6.7%  |      |
| Brain Metastasis <sup>c</sup>  | Unknown                     | 0  | 0.0%   | 1  | 6.7%  | 0.37 |
|                                | No Metastasis               | 13 | 92.9%  | 14 | 93.3% |      |
|                                | Metastasis                  | 1  | 7.1%   | 0  | 0.0%  |      |
| Liver Metastasis <sup>c</sup>  | Unknown                     | 0  | 0.0%   | 1  | 6.7%  | 0.37 |
|                                | No Metastasis               | 13 | 92.9%  | 14 | 93.3% |      |
|                                | Metastasis                  | 1  | 7.1%   | 0  | 0.0%  |      |
| Lung Metastasis <sup>c</sup>   | Unknown                     | 0  | 0.0%   | 1  | 6.7%  | 0.37 |
|                                | No Metastasis               | 13 | 92.9%  | 14 | 93.3% |      |
|                                | Metastasis                  | 1  | 7.1%   | 0  | 0.0%  |      |
| Surgery <sup>b</sup>           | Unknown                     | 0  | 0.0%   | 2  | 2.3%  | 0.34 |
|                                | No Surgery                  | 1  | 2.4%   | 6  | 7.0%  |      |
|                                | Surgery                     | 40 | 97.6%  | 78 | 90.7% |      |
| Extent of Surgery <sup>b</sup> | Unknown                     | 0  | 0.0%   | 1  | 1.2%  | 0.36 |
|                                | Unknown                     | 0  | 0.0%   | 0  | 0.0%  |      |
|                                | Surgery, Unknown            | 0  | 0.0%   | 0  | 0.0%  |      |
|                                | Mastectomy                  | 19 | 46.3%  | 29 | 33.7% |      |
|                                | Sub-Mastectomy <sup>#</sup> | 21 | 51.2%  | 49 | 57.0% |      |
| Radiation <sup>b</sup>         | Unknown                     | 2  | 4.9%   | 3  | 3.5%  | 0.92 |
|                                | No Radiation                | 20 | 48.8%  | 44 | 51.2% |      |
|                                | Radiation                   | 19 | 46.3%  | 39 | 45.3% |      |

Bolded are statistically significant p-values when comparing between glycogen-rich carcinoma with clear cell carcinoma. \* Statistically significant differences between column proportions. # Defined as any surgery less aggressive than total mastectomy. <sup>a,b,c</sup> Variable available for cases diagnosed after 1990, 1998 and 2010 respectively. ER—estrogen receptor; PR—progesterone receptor; IHC—immunohistochemistry; HER2+—human epidermal growth factor receptor 2 positive; HER2—human epidermal growth factor receptor 2 negative; HR+—hormone receptor positive; HR—hormone receptor negative; AJCC—American Joint Committee on Cancer; T, N, M refers to tumor size, nodal status and metastasis classifications of malignant tumor staging system, respectively.

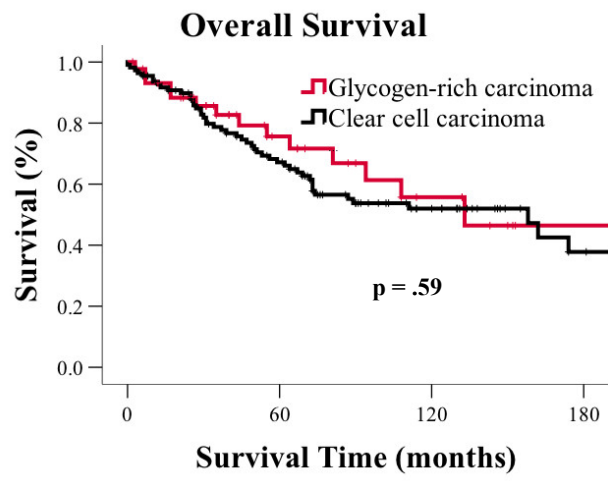

Supplemental Figure S3. Kaplan-Meier survival curves comparing glycogen-rich (GR) and clear cell (CC) carcinomas.
